# Supplementary material for: Norharmane-loaded bacterial cytoplasmic membrane-coated nanoparticles synergistically enhance polymyxin B against Pseudomonas aeruginosa infections by disrupting biofilms
Source: Royal Society of Chemistry journal article supplement (doi:10.1039/d5bm01571e), 2026-01-01
Supplement: d5bm01571e1.pdf [file d5bm01571e1.pdf]

**Norharmane-Loaded Bacterial Cytoplasmic Membranes-Coated Nanoparticles Synergistically Enhance Polymyxin B Against *Pseudomonas aeruginosa* Infections by Disrupting Biofilms**

Meilin Qiao<sup>1,\*</sup>, Licheng Gao<sup>1,\*</sup>, Ruibing Yu<sup>1</sup>, Jianwei Chen<sup>1</sup>, Xuanrong Sun<sup>1,#</sup> and Yue Cai<sup>1,#</sup>

<sup>1</sup>Collaborative Innovation Center of Yangtze River Delta Region Green Pharmaceuticals and College of Pharmaceutical Science, Zhejiang University of Technology, Hangzhou 310014, China.

\*Equal contribution

#Corresponding authors: Yue Cai, [caiyue@zjut.edu.cn](mailto:caiyue@zjut.edu.cn); Xuanrong Sun, [sunxr@zjut.edu.cn](mailto:sunxr@zjut.edu.cn).

The PM $\phi$  coating has been shown to minimize immunogenicity in comparison with conventional bacterial outer membrane vesicles (BMOVs), while concurrently facilitating precise lung targeting in murine pneumonia models.

## **Materials and methods**

### **In vitro bacteria targeting**

The *P. aeruginosa* suspension ( $OD_{600}$  of 0.5) was incubated with 10  $\mu\text{g/mL}$  FITC in 4°C PBS for 2 h to gain FITC-labeled *P. aeruginosa* (*P. aeruginosa*-FITC) [1, 2]. *P. aeruginosa*-FITC was then co-incubated with NR-labeled NPs at a NR concentration of 200 ng/mL for 2 h and observed by a fluorescence microscope (EVOS M5000, ThermoFisher, USA). For flow cytometric analysis, *P. aeruginosa* ( $OD_{600} = 0.5$ ) was co-incubated with different formulations at the same NR concentration (200 ng/mL) for 2 h and analyzed by flow cytometer (Cytotflex S, Beckman, USA).

### **In vitro biofilm penetration**

The *P. aeruginosa* suspension ( $OD_{600} = 0.5$ ) was serially diluted 1000-fold with LB medium. Subsequently, 1 mL of the diluted suspension was added to 35-mm confocal dishes and incubated for 24 h at 37 °C. Thereafter, the dishes were washed three times with PBS to remove planktonic bacteria. Then, 1 mL of fresh LB medium containing NR-labeled NPs (200 ng/mL NR) was added to each well and incubated for an additional 2 h. Following this incubation period, the wells were gently washed with cold PBS thrice. Then, the wells were fixed with 4% paraformaldehyde for 15 min at 25 °C and scanned by a laser scanning confocal microscope (STELLARIS, Leica, Germany).

### **MIC determination**

The *P. aeruginosa* suspension ( $OD_{600}$  of 0.5) was diluted 1000-fold with LB medium. 0.1 mL of the diluted suspension was added to each well of a 96-well plate. Subsequently, an additional 0.1 mL of LB medium containing a gradient concentration of NOR or PMB was added. The plate was subjected to an incubation process that involved a constant rotation speed of 100 rpm/min at a temperature of 37 °C for a duration of 16 h. The  $OD_{600}$  value of each well was measured using a microplate reader (Synergy H1, Biotek, USA). The MIC was determined as the drug concentration at which the bacterial inhibition rate exceeds 90%.

### **In vitro biofilm formation inhibition**

The *P. aeruginosa* suspension ( $OD_{600} = 0.5$ ) was serially diluted 1000-fold with fresh LB medium. 0.1 mL of the diluted suspension was added to each well of a 96-well plate. Subsequently, an additional 0.1 mL of LB medium containing NPs (10 or 20  $\mu\text{g/mL}$  NOR) and PMB (20  $\mu\text{g/mL}$ ) was added. The plate was subjected to a 24-h culture at 37°C in a static state. Following the incubation, the wells were washed with PBS three times. Then, 0.1 mL of 0.1% CV was added to each well and allowed to sit for 15 min. Following a third round of washes with PBS, the purple precipitate in each well was dissolved with 0.1 mL of 33% acetic acid. The  $OD_{570}$  value of each well was measured by means of a microplate reader.

Furthermore, the number of residual bacteria in the biofilm was also investigated [3]. The biofilm was dispersed in 100  $\mu\text{L}$  PBS using a sonicating water bath. Serial dilutions ( $10^2$ - $10^8$ ) were prepared, and 10  $\mu\text{L}$  of each dilution was spread on LB plates for counting.

To intuitionistic observation of the destruction of biofilm after antibiotic incubation, a holographic 3D microscope, Nanolive (3D Cell Explorer, Nanolive SA, Switzerland), was used to scan the

residual biofilm through the z-axis [3]. The software “Steve 1.6.3496” (Nanolive SA, Switzerland) was used for image acquisition and reconstruction.

### **In vivo pharmacokinetics**

A total of 24 ICR mice (6 weeks old, 17-19 g) were divided into two groups and intraperitoneally injected with NOR or PM $\phi$ -PLGA-NOR at a NOR dosage of 5 mg/kg, respectively. At predetermined time points, 0.25 mL of blood was collected from the vein of the fundus plexus and placed in heparin-anticoagulated centrifuge tubes. The tubes were then subjected to centrifugation at 5000 g for 15 min at 4 °C. A volume of 100  $\mu$ L of plasma was combined with 10  $\mu$ L of IS standard solution and 300  $\mu$ L of acetonitrile. Following the vortex mixing stage, the mixture underwent a centrifugation process at 12,000 g for a duration of 10 min at 4 °C. The supernatant was extracted and maintained at 37 °C for the purpose of nitrogen blowing. Following the drying process, the samples were redissolved in 100  $\mu$ L of the initial mobile phase (a 10% methanol aqueous solution). The samples were subjected to centrifugation at 12,000 g at 4 °C for 10 min. The supernatant was collected for liquid chromatograph-mass spectrometer (LC-MS) analysis. The chromatographic conditions were as follows:

The Poroshell 120 SB-C18 chromatographic column (2.1 $\times$ 50 mm, 1.9  $\mu$ m, Agilent, USA) was selected as the chromatographic column. The mobile phase was configured as a 10% methanol solution in water for the initial 5 min, followed by a transition to a 10-100% methanol solution in water for the subsequent 5-20 min. This was then followed by a return to a 10% methanol solution in water for the final 20-25 min. The flow rate was set at 0.3 mL/min, and the injection volume was set at 1  $\mu$ L.

A tandem quadrupole mass spectrometer (TRIPLE QUAD 3500, AB Sciex, USA) was used. Ion source: electrospray ion source, positive ion mode; Scanning mode: multiple reaction monitoring; Air curtain air: 35 Psi. Collision gas, 8 Psi. Spray voltage: 5500 V; Atomization temperature: 550 °C; Aerosol: 55 Psi; Auxiliary gas: 55 Psi; To cluster voltage: 130 V; Into the voltage: 10 V; Collision chamber injection voltage: 6 V.

### ***In vitro and in vivo biosafety evaluation***

Mouse fibroblast L929 cells were seeded in a 96-well plate at a density of 5,000 cells per well. Following a 12 h incubation period, the existing medium was removed and 100  $\mu$ L of fresh medium containing NOR or M $\phi$ -PLGA-NOR was added. Following a 24 h incubation period, 10  $\mu$ L of MTT (5 mg/mL) was added to each well and incubated for 4 h. Thereafter, the medium was removed and 100  $\mu$ L of DMSO was added to each well to dissolve the purple crystal. The OD<sub>570</sub> value of each well was subsequently measured by means of a microplate reader.

For the hemolysis experiment, 2 mL of blood was collected from the abdominal aorta of ICR mice and diluted with 30 mL of ice-cold PBS. The blood was subjected to centrifugation at 3,000 rpm for 20 min to collect erythrocytes. The erythrocytes were then incubated with NPs at 37 °C for 4 h and then subjected to centrifugation at 3000 rpm for 20 min. The supernatant was collected, and the OD<sub>540</sub> value was measured.

For *in vivo* biosafety test, healthy ICR (6 weeks old, 17-19 g) mice were randomly divided into four groups (PBS, PMB, PMB+NOR, and PMB+PM $\phi$ -PLGA-NOR) (n=3). The mice were administered intraperitoneally with various formulations (NOR 10 mg/kg, PMB 3 mg/kg) every 12 h for a total of two times. 24 h after the last administration, the mice were euthanized, and their hearts, spleens, kidneys, livers, and lungs were collected and fixed in 4% paraformaldehyde solution. H&E staining of the sections was carried out.

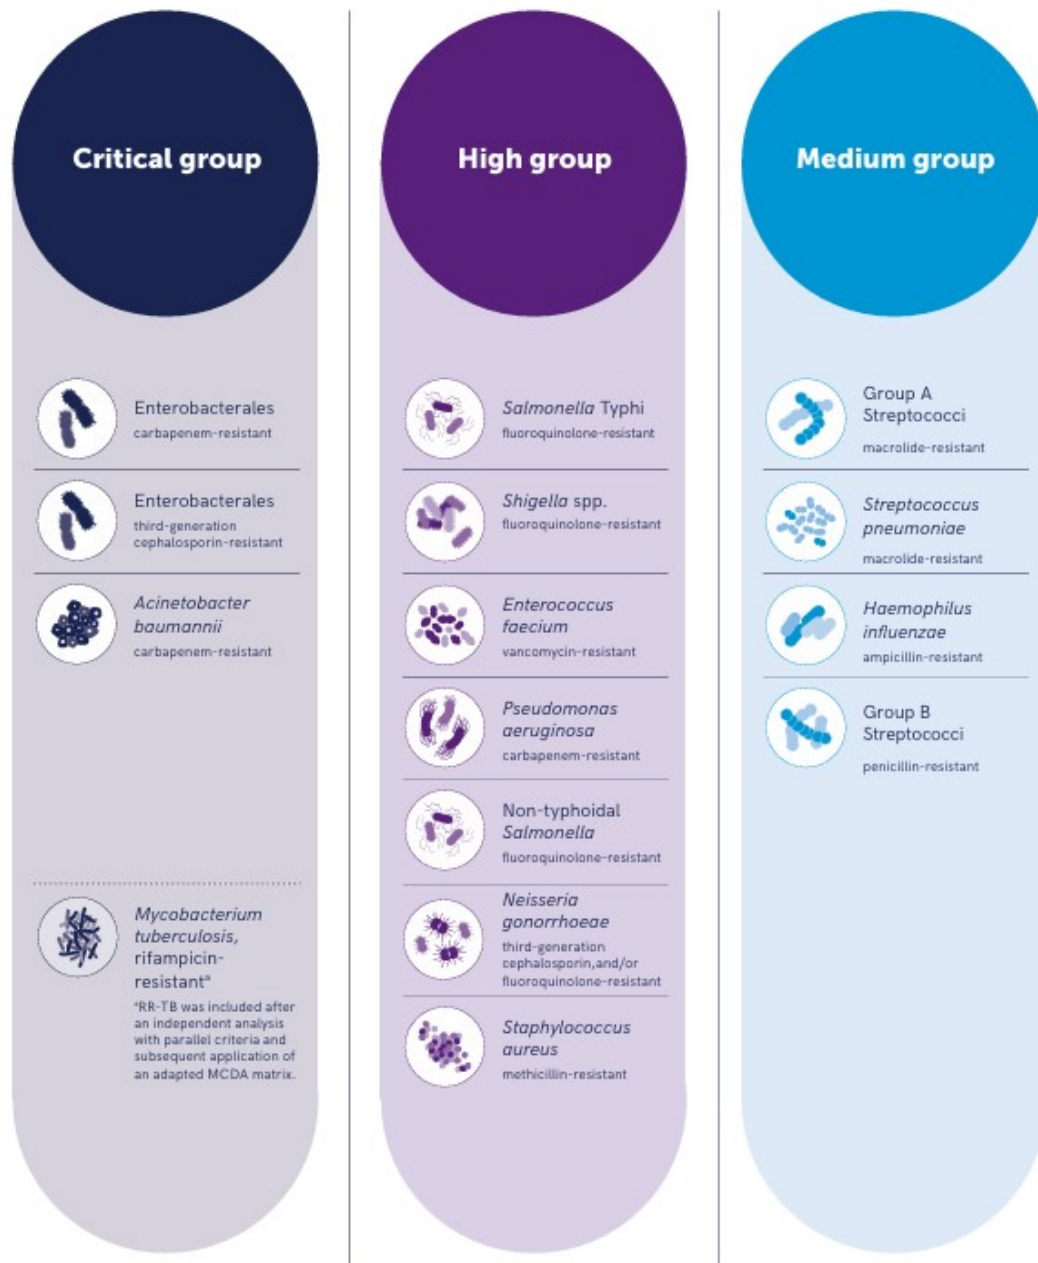

**Figure. S1** WHO Bacterial Priority Pathogens List, 2024.

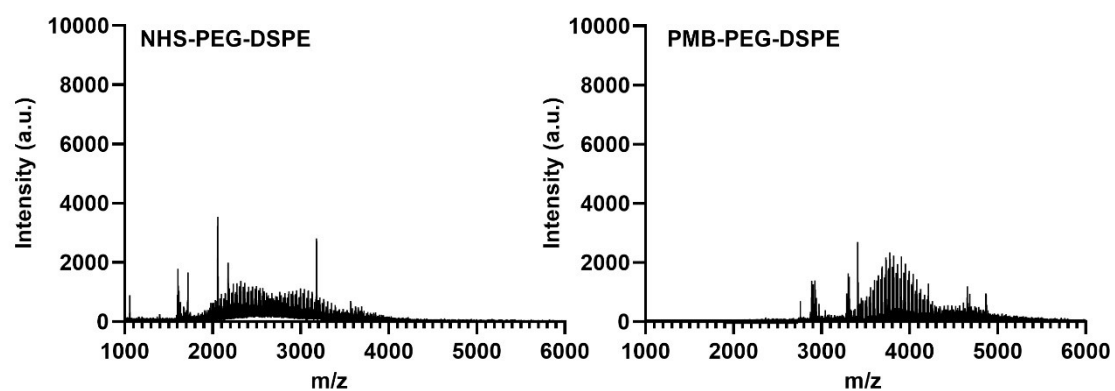

**Figure. S2** The MALDI-TOF-MS spectrum of NHS-PEG-DSPE and PMB-PEG-DSPE.

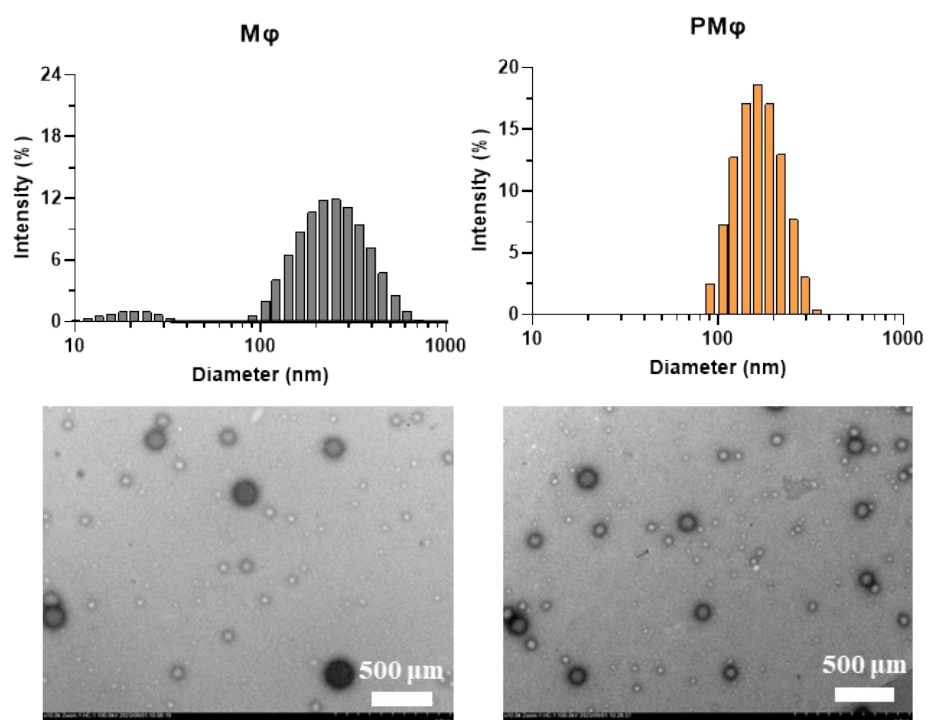

**Figure S3.** Size distribution and TEM images of Mφ and PMφ.

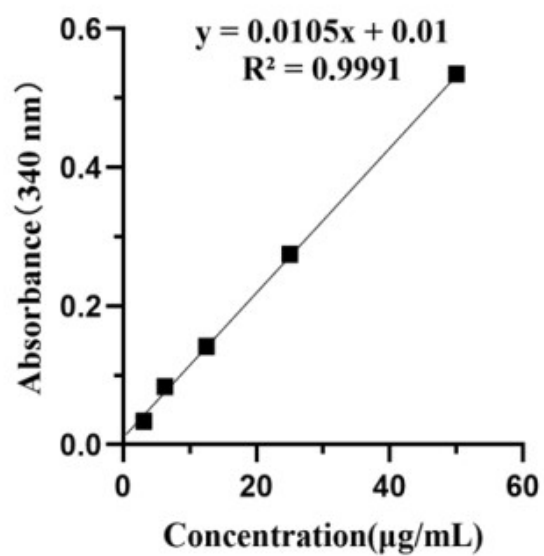

**Figure S4.** Quantitative curve for determining NOR using the microplate spectrophotometer method. For drug-loading quantification, where the composition is relatively simple with a relatively high NOR content, the NOR content can be measured using a microplate spectrophotometer.



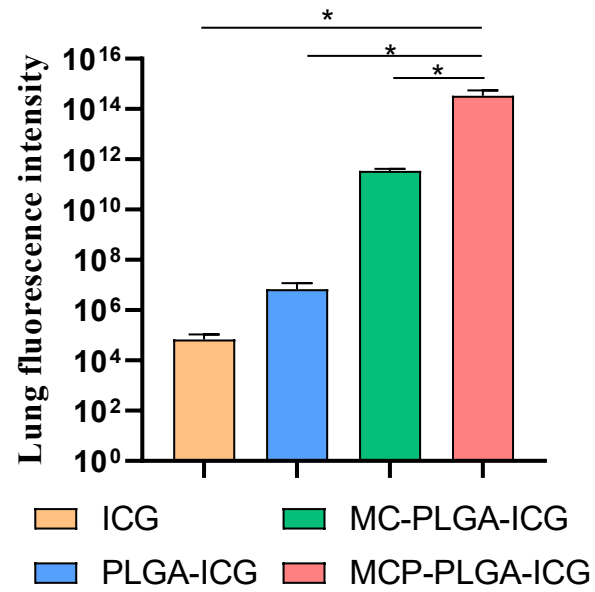

**Figure S5.** Quantitative analysis of fluorescence in the lungs of mice after administration of different ICG-labeled preparations (n=3). Data are expressed as mean  $\pm$  SD.

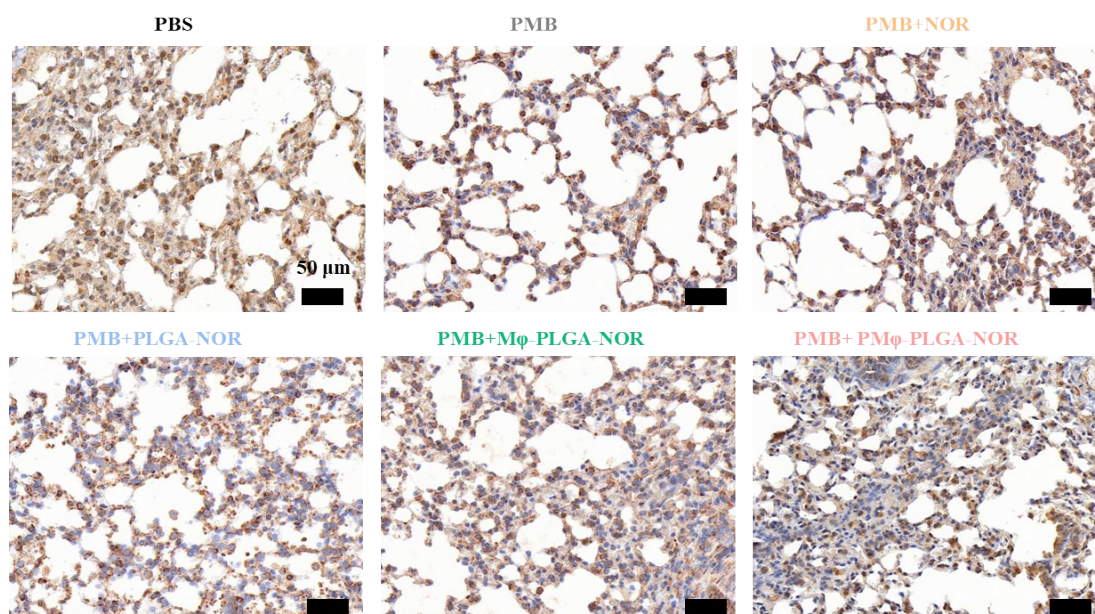

**Figure S6.** Immunohistochemical sections of TNF- $\alpha$  were further provided in the lung tissues of different treated mice.

## Reference

- [1] Y. Cai, X.R. Zhang, W.T. Hu, F.H. Song, H. Wang, H.W. Zhang, X.R. Sun, Enhancing transdermal delivery of chrysomycin A for the treatment of cutaneous melanoma and MRSA infections using Skin-Penetrating Peptide-Functionalized deformable liposomes, *Int J Pharmaceut* 670 (2025). ARTN 125130 10.1016/j.ijpharm.2024.125130.
- [2] Y. Cai, M.L. Qiao, X.Z. Xie, Y.J. Zhou, R.B. Yu, F.H. Song, H. Wang, H.W. Zhang, X.R. Sun, Intracellular MRSA-targeted lipid-polymer hybrid nanoparticles for macrophage reprogramming and intracellular MRSA eradication, *Chem Eng J* 505 (2025). ARTN 159665 10.1016/j.cej.2025.159665.
- [3] Y. Cai, Y.T. Chu, Y.B. Gong, Y.L. Hong, F.H. Song, H. Wang, H.W. Zhang, X.R. Sun, Enhanced Transdermal Peptide-Modified Flexible Liposomes for Efficient Percutaneous Delivery of Chrysomycin A to Treat Subcutaneous Melanoma and Intradermal MRSA Infection, *Advanced Healthcare Materials* 12(26) (2023). 10.1002/adhm.202300881.
